# Supplementary material
Source: PubMed Central journal article supplement (PMC4286442)
Supplement: NIHMS630123-supplement-eTables.pdf [file NIHMS630123-supplement-eTables.pdf]

**Online only materials:**

**eTable 1: Frequency of Specific Major Congenital Anomalies within Anomaly Categories**

**eTable 2: Anomalies reported among children exposed to atazanavir during the first trimester**

**eTable 3: Association of Timing of First ARV Exposure During Pregnancy with Congenital Anomalies by ARV Drug Class and for Specific ARV Drugs**

**eTable 1. Frequency of Specific Major Congenital Anomalies within Anomaly Categories**

| Anomaly Category             | Total # of major anomalies (Total=242) | # of children with at least one anomaly in category (Total=201) | List of Major Anomalies                                                                                                                                                                                                                                                                                                                                                                                                                                                                                                             |
|------------------------------|----------------------------------------|-----------------------------------------------------------------|-------------------------------------------------------------------------------------------------------------------------------------------------------------------------------------------------------------------------------------------------------------------------------------------------------------------------------------------------------------------------------------------------------------------------------------------------------------------------------------------------------------------------------------|
| Musculoskeletal              | 72                                     | 59                                                              | Polydactyly (15), torticollis/muscular anomaly (12), clubfoot, talipes, other foot deformity (9), congenital dislocation of hip (5), craniosynostosis (4), plagiocephaly (4), pectus excavatum/funnel chest (3), lower limb anomaly (3), hypertelorism/other face or skull anomaly (3), spina bifida occulta/spine anomaly (3), syndactyly (3), inguinal hernia (2), diaphragmatic hernia/Morgagni, genu recurvatum/bowed legs, rib/sternum anomaly, scoliosis/congenital spine deformity, upper limb anomaly, upper limb reduction |
| Cardiovascular               | 55                                     | 41                                                              | Ventricular septal defect (13), patent foramen ovale (9), atrial septal defect (8), patent ductus arteriosus (7), pulmonary valve stenosis (5), atrioventricular canal (4), anomaly of coronary artery (2), pulmonary artery stenosis (2), bicuspid aortic valve, congenital mitral stenosis, hypoplastic left ventricle, tetralogy of Fallot, tricuspid valve regurgitation                                                                                                                                                        |
| Facial                       | 20                                     | 17                                                              | Anomaly of eyelid/lacrimal system (5), branchial cleft (3), congenital cataract/lens anomaly (3), congenital hearing impairment (2), abnormal fascia, excess skin on neck, accessory auricle, agenesis of eye, corneal opacity, micrognathia, downward slanting eyes                                                                                                                                                                                                                                                                |
| Central Nervous System/Brain | 19                                     | 14                                                              | Microcephaly (5), hydrocephaly (3), macrocephaly (3), spina bifida (2), tethered cord/spinal cord anomaly (2), anencephaly, anomaly of corpus callosum, encephalocele, holoprosencephaly                                                                                                                                                                                                                                                                                                                                            |
| Male Genital                 | 16                                     | 15                                                              | Hypospadias/chordee (8), cryptorchidism(7), congenital penile torsion                                                                                                                                                                                                                                                                                                                                                                                                                                                               |
| Renal                        | 16                                     | 12                                                              | Congenital hydronephrosis (4), vesicoureteral reflux (4), renal agenesis or dysgenesis (2), renal cyst/polycystic kidney (2), accessory ureter, atresia/stenosis of urethra, ectopic kidney, obstructive defect of renal pelvis/ureter                                                                                                                                                                                                                                                                                              |
| Chromosomal                  | 11                                     | 11                                                              | Trisomy 21 (Down Syndrome) (8), Trisomy 13 (Patau Syndrome), Mosaic Trisomy 8, duplication of chromosome                                                                                                                                                                                                                                                                                                                                                                                                                            |
| Skin                         | 10                                     | 10                                                              | Hemangioma (4), lipoma (2), pigment disorder (2), cystic hygroma, teratoma                                                                                                                                                                                                                                                                                                                                                                                                                                                          |
| Mouth/Upper Gastrointestinal | 7                                      | 7                                                               | Congenital pyloric stenosis (4), lip anomaly, macroglossia, malrotation of stomach                                                                                                                                                                                                                                                                                                                                                                                                                                                  |
| Cleft Disorders              | 4                                      | 3                                                               | Cleft lip and palate (3), cleft uvula                                                                                                                                                                                                                                                                                                                                                                                                                                                                                               |
| Respiratory                  | 3                                      | 3                                                               | Anomaly of larynx/trachea (3)                                                                                                                                                                                                                                                                                                                                                                                                                                                                                                       |
| Lower Gastrointestinal       | 3                                      | 3                                                               | Cystic/fibrocystic liver, Hirschsprung's disease, intestinal rotation                                                                                                                                                                                                                                                                                                                                                                                                                                                               |
| Other anomaly                | 6                                      | 5                                                               | Congenital adrenal hyperplasia (2), fetal alcohol syndrome, hemihypertrophy, situs inversus, Wolfe-Parkinson-White syndrome                                                                                                                                                                                                                                                                                                                                                                                                         |

**eTable 2. Anomalies reported among children exposed to atazanavir during the first trimester (also included in eTable 1)**

| Anomaly Category             | Total # of major anomalies (Total=39) | # of children with at least one anomaly in category (Total=33) | List of Major Anomalies                                                                                                                                                                                                                       |
|------------------------------|---------------------------------------|----------------------------------------------------------------|-----------------------------------------------------------------------------------------------------------------------------------------------------------------------------------------------------------------------------------------------|
| Musculoskeletal              | 13                                    | 11                                                             | Clubfoot/talipes/other foot deformity (2), polydactyly (2), torticollis (2), congenital dislocation of hip, craniosynostosis, rib/sternum anomaly, scoliosis/congenital spine deformity, spina bifida occulta, syndactyly, upper limb anomaly |
| Cardiovascular               | 9                                     | 7                                                              | Ventricular septal defect (4), anomaly of coronary artery, atrial septal defect, patent foramen ovale, pulmonary artery stenosis, pulmonary valve stenosis                                                                                    |
| Skin                         | 3                                     | 3                                                              | Hemangioma (2), teratoma                                                                                                                                                                                                                      |
| Central Nervous System/Brain | 3                                     | 2                                                              | Anomaly of corpus callosum, hydrocephaly, microcephaly                                                                                                                                                                                        |
| Renal                        | 3                                     | 2                                                              | Congenital hydronephrosis (2), vesicoureteral reflux                                                                                                                                                                                          |
| Facial                       | 2                                     | 2                                                              | Anomaly of eyelid/lacrimal system, congenital hearing impairment                                                                                                                                                                              |
| Lower gastrointestinal       | 2                                     | 2                                                              | Cystic/fibrocystic liver, Hirschsprung's disease                                                                                                                                                                                              |
| Other types                  | 4                                     | 4                                                              | <b>Chromosomal:</b> duplication of chromosome; <b>Male Genital:</b> hypospadias; <b>Mouth/Upper gastrointestinal:</b> congenital pyloric stenosis; <b>Other:</b> congenital adrenal hyperplasia                                               |

**eTable 3. Association of Timing of First ARV Exposure During Pregnancy with Congenital Anomalies by ARV Drug Class and for Specific ARV Drugs**

| ARV Exposure                      | First exposure during pregnancy            | % in category | Anomaly rate    | Unadjusted Models |         | Adjusted Models*   |         |
|-----------------------------------|--------------------------------------------|---------------|-----------------|-------------------|---------|--------------------|---------|
|                                   |                                            |               |                 | OR (95% CI)       | P-value | OR (95% CI)        | P-value |
| <b>Any ARV</b>                    | Never exposed                              | 2.7           | 3/68 (4.4%)     | 1.00              | ref     | 1.00               | ref     |
|                                   | 1st trimester                              | 48.4          | 93/1219 (7.6%)  | 1.79 (0.55, 5.80) | 0.33    | 2.34 (0.31, 17.40) | 0.41    |
|                                   | 2nd/3rd trimester                          | 48.9          | 73/1230 (5.9%)  | 1.37 (0.42, 4.45) | 0.60    | 1.97 (0.26, 14.68) | 0.51    |
| <b>HAART</b>                      | Never exposed                              | 18.4          | 30/462 (6.5%)   | 1.00              | ref     | 1.00               | ref     |
|                                   | 1st trimester                              | 40.7          | 83/1025 (8.1%)  | 1.27 (0.83, 1.96) | 0.28    | 1.14 (0.72, 1.82)  | 0.58    |
|                                   | 2nd/3rd trimester                          | 40.9          | 56/1029 (5.4%)  | 0.83 (0.53, 1.31) | 0.43    | 0.79 (0.48, 1.28)  | 0.33    |
| <b>PIs</b>                        | Never exposed                              | 26.1          | 36/657 (5.5%)   | 1.00              | ref     | 1.00               | Ref     |
|                                   | 1st trimester                              | 35.2          | 75/887 (8.5%)   | 1.59 (1.06, 2.40) | 0.026   | 1.39 (0.90, 2.16)  | 0.14    |
|                                   | 2nd/3rd trimester                          | 38.7          | 58/973 (6.0%)   | 1.09 (0.71, 1.68) | 0.68    | 1.01 (0.64, 1.59)  | 0.98    |
| <b>NNRTIs</b>                     | Never exposed                              | 85.7          | 155/2156 (7.2%) | 1.00              | ref     | 1.00               | ref     |
|                                   | 1st trimester                              | 8.5           | 13/214 (6.1%)   | 0.83 (0.47, 1.50) | 0.55    | 0.91 (0.51, 1.65)  | 0.76    |
|                                   | 2nd/3rd trimester                          | 5.8           | 1/147 (0.7%)    | 0.09 (0.01, 0.64) | 0.016   | 0.11 (0.02, 0.81)  | 0.030   |
| <b>Among Specific ARV drugs**</b> |                                            |               |                 |                   |         |                    |         |
| <b>Abacavir (ABC)</b>             | Never exposed                              | 79.5          | 123/2002 (6.1%) | 1.00              | ref     | 1.00               | Ref     |
|                                   | 1 <sup>st</sup> trimester                  | 8.8           | 15/222 (6.8%)   | 1.11 (0.64, 1.93) | 0.72    | 1.03 (0.58, 1.84)  | 0.91    |
|                                   | 2 <sup>nd</sup> /3 <sup>rd</sup> trimester | 11.6          | 31/293 (10.6%)  | 1.81 (1.19, 2.74) | 0.005   | 1.75 (1.14, 2.68)  | 0.010   |
| <b>Atazanavir (ATV)</b>           | Never exposed                              | 85.1          | 131/2143 (6.1%) | 1.00              | ref     | 1.00               | Ref     |
|                                   | 1st trimester                              | 8.8           | 26/222 (11.7%)  | 2.04 (1.30, 3.18) | 0.002   | 1.99 (1.26, 3.13)  | 0.003   |
|                                   | 2nd/3rd trimester                          | 6.0           | 12/152 (7.9%)   | 1.32 (0.71, 2.44) | 0.38    | 1.28 (0.69, 2.38)  | 0.44    |
| <b>Lamivudine (3TC)</b>           | Never exposed                              | 25.7          | 32/647 (4.9%)   | 1.00              | ref     | 1.00               | Ref     |
|                                   | 1 <sup>st</sup> trimester                  | 31.7          | 63/797 (7.9%)   | 1.65 (1.06, 2.56) | 0.025   | 1.41 (0.89, 2.24)  | 0.14    |
|                                   | 2 <sup>nd</sup> /3 <sup>rd</sup> trimester | 42.6          | 74/1073 (6.9%)  | 1.42 (0.93, 2.18) | 0.105   | 1.37 (0.89, 2.13)  | 0.16    |
| <b>Lopinavir (LPV/r)</b>          | Never exposed                              | 67.3          | 103/1693 (6.1%) | 1.00              | ref     | 1.00               | Ref     |

| ARV Exposure                       | First exposure during pregnancy            | % in category | Anomaly rate    | Unadjusted Models  |         | Adjusted Models*  |         |
|------------------------------------|--------------------------------------------|---------------|-----------------|--------------------|---------|-------------------|---------|
|                                    |                                            |               |                 | OR (95% CI)        | P-value | OR (95% CI)       | P-value |
|                                    | 1st trimester                              | 13.5          | 32/341 (9.4%)   | 1.60 (1.06, 2.42)  | 0.027   | 1.40 (0.91, 2.17) | 0.13    |
|                                    | 2nd/3rd trimester                          | 19.2          | 34/483 (7.0%)   | 1.17 (0.78, 1.75)  | 0.45    | 1.08 (0.71, 1.64) | 0.73    |
| <b>Nevirapine (NVP)</b>            | Never exposed                              | 90.9          | 161/2287 (7.0%) | 1.00               | ref     | 1.00              | Ref     |
|                                    | 1 <sup>st</sup> trimester                  | 4.6           | 7/115 (6.1%)    | 0.86 (0.39, 1.87)  | 0.70    | 0.99 (0.45, 2.18) | 0.98    |
|                                    | 2 <sup>nd</sup> /3 <sup>rd</sup> trimester | 4.6           | 1/115 (0.9%)    | 0.12 (0.02, 0.83)  | 0.032   | 0.16 (0.02, 1.15) | 0.069   |
| <b>Ritonavir (as booster)</b>      | Never exposed                              | 47.1          | 70/1186 (5.9%)  | 1.00               | ref     | 1.00              | Ref     |
|                                    | 1st trimester                              | 25.2          | 59/635 (9.3%)   | 1.63 (1.14, 2.34)  | 0.008   | 1.49 (1.02, 2.19) | 0.042   |
|                                    | 2nd/3rd trimester                          | 27.7          | 40/696 (5.7%)   | 0.97 (0.65, 1.45)  | 0.89    | 0.90 (0.59, 1.38) | 0.63    |
| <b>Stavudine (d4T)</b>             | Never exposed                              | 95.9          | 159/2414 (6.6%) | 1.00               | ref     | 1.00              | Ref     |
|                                    | 1 <sup>st</sup> trimester                  | 2.7           | 4/68 (5.9%)     | 0.89 (0.32, 2.47)  | 0.82    | 1.15 (0.41, 3.23) | 0.79    |
|                                    | 2 <sup>nd</sup> /3 <sup>rd</sup> trimester | 1.4           | 6/35 (17.1%)    | 2.93 (1.20, 7.17)  | 0.018   | 3.23 (1.21, 8.63) | 0.019   |
| <b>Zidovudine (ZDV)</b>            | Never exposed                              | 24.9          | 31/627 (4.9%)   | 1.00               | ref     | 1.00              | Ref     |
|                                    | 1 <sup>st</sup> trimester                  | 28.8          | 57/726 (7.9%)   | 1.64 (1.04, 2.57)  | 0.032   | 1.44 (0.90, 2.32) | 0.13    |
|                                    | 2 <sup>nd</sup> /3 <sup>rd</sup> trimester | 46.2          | 81/1164 (7.0%)  | 1.44 (0.94, 2.20)  | 0.095   | 1.47 (0.95, 2.29) | 0.083   |
| <b>Among Selected Combinations</b> |                                            |               |                 |                    |         |                   |         |
| <b>Zidovudine plus Lamivudine</b>  | Never exposed                              | 30.3          | 35/763 (4.6%)   | 1.00               | ref     | 1.00              | Ref     |
|                                    | 1 <sup>st</sup> trimester                  | 27.2          | 57/684 (8.3%)   | 1.89 (1.22, 2.92)  | 0.004   | 1.58 (1.00, 2.50) | 0.048   |
|                                    | 2 <sup>nd</sup> /3 <sup>rd</sup> trimester | 42.5          | 77/1070 (7.2%)  | 1.61 (1.07, 2.43)  | 0.023   | 1.56 (1.02, 2.38) | 0.039   |
| <b>Didanosine plus Stavudine</b>   | Never exposed                              | 99.5          | 166/2505 (6.6%) | 1.00               | ref     | 1.00              | Ref     |
|                                    | 1 <sup>st</sup> trimester                  | 0.3           | 2/7 (28.6%)     | 5.64 (1.09, 29.27) | 0.040   | 8.17 (1.52, 43.8) | 0.014   |
|                                    | 2 <sup>nd</sup> /3 <sup>rd</sup> trimester | 0.2           | 1/5 (20.0%)     | 3.53 (0.39, 31.72) | 0.26    | NE                | ---     |

OR=odds ratio, CI=confidence interval, NE=not estimated due to sparse data, HAART=highly active antiretroviral treatment, PI=protease inhibitor, NRTI=nucleoside reverse transcriptase inhibitor, NNRTI=non-nucleoside reverse transcriptase inhibitor

\*Adjusted model includes birth cohort and low early CD4 (<250 cells/uL); \*\* Specific ARV drugs and ARV combinations were included if they had a significant or marginally significant association with congenital anomaly case status for at least one time period (either 1<sup>st</sup> trimester or 2<sup>nd</sup>/3<sup>rd</sup> trimester, as compared to never exposed).
